# Supplementary material for: Exploring Factors Associated with Physical Activity in the Elderly: A Cross-Sectional Study during the COVID-19 Pandemic
Source: MDPI journal article supplement (doi:10.3390/bs14010062), 2024-01-17
Supplement: s1 [file s1]

Supplementary table 1. Translated (Croatian) version of the PASE questionnaire

| REDNI BROJ | AKTIVNOSTI SLOBODNOG VREMENA                                                                                                                                                  | ODGOVORI                                |                                                      |                                                   |                                                    |
|------------|-------------------------------------------------------------------------------------------------------------------------------------------------------------------------------|-----------------------------------------|------------------------------------------------------|---------------------------------------------------|----------------------------------------------------|
| 1          | Tijekom proteklih 7 dana, koliko često ste provodili sjedilačke aktivnosti kao što je čitanje, gledanje TV-a ili ručni rad?                                                   | NISAM UOPĆE<br>(prijeđite na pitanje 2) | RIJETKO (1-2 DANA)<br>(prijeđite na pitanje 1a i 1b) | PONEKAD (1-2 DANA) (prijeđite na pitanje 1a i 1b) | ČESTO (1-2 DANA)<br>(prijeđite na pitanje 1a i 1b) |
| 1a         | Koje su to bile aktivnosti?                                                                                                                                                   | upišite odgovor                         |                                                      |                                                   |                                                    |
| 1b         | U prosjeku koliko ste sati proveli u tim sjedilačkim aktivnostima?                                                                                                            | < 1 sata                                | 1-2 sata                                             | >2-4 sata                                         | > 4 sata                                           |
|            |                                                                                                                                                                               |                                         |                                                      |                                                   |                                                    |
| 2          | Tijekom proteklih 7 dana, koliko često ste hodali izvan doma ili dvorišta zbog bilo kojeg razloga? Primjerice, radi zabave ili vježbanja, šetnja do posla, šetanje psa, itd.? | NISAM UOPĆE<br>(prijeđite na pitanje 3) | RIJETKO (1-2 DANA)<br>(prijeđite na pitanje 2a i 2b) | PONEKAD (1-2 DANA)(prijeđite na pitanje 2a i 2b)  | ČESTO (1-2 DANA)(prijeđite na pitanje 2a i 2b)     |
| 2a         | U prosjeku koliko ste sati dnevno hodali?                                                                                                                                     | < 1 sata                                | 1-2 sata                                             | >2-4 sata                                         | > 4 sata                                           |
|            |                                                                                                                                                                               |                                         |                                                      |                                                   |                                                    |
| 3          | Tijekom proteklih 7 dana, koliko često ste sudjelovali u laganim sportskim ili rekreativnim aktivnostima kao što su kuglanje, balote (buće), pecanje iz barke i sl.?          | NISAM UOPĆE<br>(prijeđite na pitanje 4) | RIJETKO (1-2 DANA)<br>(prijeđite na pitanje 3a i 3b) | PONEKAD (1-2 DANA) (prijeđite na pitanje 3a i 3b) | ČESTO (1-2 DANA)<br>(prijeđite na pitanje 3a i 3b) |
| 3a         | Koje su to bile aktivnosti?                                                                                                                                                   | upišite odgovor                         |                                                      |                                                   |                                                    |
| 3b         | U prosjeku koliko ste sati proveli u tim laganim sportskim i rekreativnim aktivnostima?                                                                                       | < 1 sata                                | 1-2 sata                                             | >2-4 sata                                         | > 4 sata                                           |

|    |                                                                                                                                                                                                       |                                         |                                                      |                                                   |                                                    |
|----|-------------------------------------------------------------------------------------------------------------------------------------------------------------------------------------------------------|-----------------------------------------|------------------------------------------------------|---------------------------------------------------|----------------------------------------------------|
|    |                                                                                                                                                                                                       |                                         |                                                      |                                                   |                                                    |
| 4  | Tijekom proteklih 7 dana, koliko često ste sudjelovali u umjerenim sportskim i kreativnim aktivnostima kao što su tenis parovi, ples, lov, golf, stolni tenis i sl.?                                  | NISAM UOPĆE<br>(prijeđite na pitanje 5) | RIJETKO (1-2 DANA)<br>(prijeđite na pitanje 4a i 4b) | PONEKAD (1-2 DANA) (prijeđite na pitanje 4a i 4b) | ČESTO (1-2 DANA)<br>(prijeđite na pitanje 4a i 4b) |
| 4a | Koje su to bile aktivnosti?                                                                                                                                                                           | upišite odgovor                         |                                                      |                                                   |                                                    |
| 4b | U prosjeku koliko ste sati proveli u tim umjerenim sportskim i rekreativnim aktivnostima?                                                                                                             | < 1 sata                                | 1-2 sata                                             | >2-4 sata                                         | > 4 sata                                           |
|    |                                                                                                                                                                                                       |                                         |                                                      |                                                   |                                                    |
| 5  | Tijekom proteklih 7 dana, koliko često ste provodili intenzivne/naporne sportske i rekreativne aktivnosti kao što su trčanje, plivanje, vožnja bicikla, tenis, aerobika, mali nogomet, skijanje i sl. | NISAM UOPĆE<br>(prijeđite na pitanje 6) | RIJETKO (1-2 DANA)<br>(prijeđite na pitanje 5a i 5b) | PONEKAD (1-2 DANA) (prijeđite na pitanje 5a i 5b) | ČESTO (1-2 DANA)<br>(prijeđite na pitanje 5a i 5b) |
| 5a | Koje su to bile aktivnosti?                                                                                                                                                                           | upišite odgovor                         |                                                      |                                                   |                                                    |
| 5b | U prosjeku koliko ste sati proveli u tim intenzivnim/napornim sportskim i rekreativnim aktivnostima?                                                                                                  | < 1 sata                                | 1-2 sata                                             | >2-4 sata                                         | > 4 sata                                           |
|    |                                                                                                                                                                                                       |                                         |                                                      |                                                   |                                                    |
| 6  | Tijekom proteklih 7 dana, koliko često ste učestvovali u bilo kakvoj vrsti specifičnog vježbanja radi poboljšanja snage i izdržljivosti, kao što su vježbe s utezima i                                | NISAM UOPĆE<br>(prijeđite na pitanje 7) | RIJETKO (1-2 DANA)<br>(prijeđite na pitanje 6a i 6b) | PONEKAD (1-2 DANA)(prijeđite na pitanje 6a i 6b)  | ČESTO (1-2 DANA)<br>(prijeđite na pitanje 6a i 6b) |

|                   |                                                                                                                                                                       |                                                                           |                                                                                               |                         |                                                                                |
|-------------------|-----------------------------------------------------------------------------------------------------------------------------------------------------------------------|---------------------------------------------------------------------------|-----------------------------------------------------------------------------------------------|-------------------------|--------------------------------------------------------------------------------|
|                   | drugim opterećenjima (elastične trake, sprave za vježbanje, itd.)?                                                                                                    |                                                                           |                                                                                               |                         |                                                                                |
| 6a                | Koje su to bile aktivnosti?                                                                                                                                           | upišite odgovor                                                           |                                                                                               |                         |                                                                                |
| 6b                | U prosjeku koliko ste sati proveli u takvim sportskim i rekreativnim aktivnostima?                                                                                    | < 1 sata                                                                  | 1-2 sata                                                                                      | >2-4 sata               | > 4 sata                                                                       |
| <b>REDNI BROJ</b> | <b>KUĆNI POSLOVI/AKTIVNOSTI</b>                                                                                                                                       |                                                                           |                                                                                               |                         |                                                                                |
| 7                 | Tijekom proteklih 7 dana, jeste li obavljali lagane kućanske poslove, kao što su brisanje prašine ili pranje posuđa?                                                  | Ne                                                                        | Da                                                                                            |                         |                                                                                |
| 8                 | Tijekom proteklih 7 dana, jeste li obavljali teške kućanske poslove ili zadatke, kao što su usisavanje, ribanje podova, pranje prozora ili prenošenje drva za ogrjev? | Ne                                                                        | Da                                                                                            |                         |                                                                                |
| 9                 | Tijekom proteklih 7 dana, jeste li obavljali neku od navedenih aktivnosti? Molimo odgovorite DA ili NE za svaku od aktivnosti.                                        | Kućni popravci, bojanje, lijepljenje tapeta, električarski poslovi, itd.? | Košanje vrta i orezivanje biljaka okućnice, čišćenje snijega ili lišća, cijepanje drva, itd.? | Vrtlarenje na otvorenom | Briga o drugim osobama, primjerice djeca, bračni drug ili druge odrasle osobe? |
| <b>REDNI BROJ</b> | <b>RADNE AKTIVNOSTI</b>                                                                                                                                               | <b>ODGOVORI</b>                                                           |                                                                                               |                         |                                                                                |
| 10                | Tijekom proteklih 7 dana, jeste li radili za novac ili kao volonter?                                                                                                  | Ne                                                                        | Da (prijedite na pitanje 10a i 10b)                                                           |                         |                                                                                |

|     |                                                                                                                                |                                                                                                                      |                                                                                                      |                                                                                                                                                                               |                                                                                                                                                    |
|-----|--------------------------------------------------------------------------------------------------------------------------------|----------------------------------------------------------------------------------------------------------------------|------------------------------------------------------------------------------------------------------|-------------------------------------------------------------------------------------------------------------------------------------------------------------------------------|----------------------------------------------------------------------------------------------------------------------------------------------------|
| 10a | Koliko sati tjedno ste radili za novac ili kao volonter?                                                                       | Sati: _____                                                                                                          |                                                                                                      |                                                                                                                                                                               |                                                                                                                                                    |
| 10b | Koja od ovih kategorija najbolje opisuje količinu tjelesne aktivnosti koju zahtjeva taj posao/volontiranje koje ste obavljali? | Uglavnom sjedenje sa malim kretanjem ruku (uredski poslovi, nadzor, sjedeći poslovi slaganja, vožnja autobusa, itd.) | Sjedenje ili stajanje uz manje hodanje (blagajnik, upravljanje laganim alatima ili strojevima, itd.) | Hodanje uz određeno upravljanje materijalima lakšim od 25 kg (poštarski i dostavljački poslovi, konobarenje, rad na građevini, upravljanje teškim strojevima i alatima, itd.) | Hodanje i teški manualni rad koji često zahtjeva upravljanje materijalima težim od 25 kg (poslovi drvosječe, klesarski poslovi, fizički rad, itd.) |
