# Supplementary material for: Exploring Factors Associated with Physical Activity in the Elderly: A Cross-Sectional Study during the COVID-19 Pandemic
Source: MDPI journal article supplement (doi:10.3390/bs14010062), 2024-01-17
Supplement: s1 [file s1]

**Supplementary table 2. Test – retest percentage of equally responded queries for Physical Activity Scale for Elderly (PASE)**

| <b>LEISURE TIME PHYSICAL ACTIVITY</b>                                                                                                                                                                                            | <b>Test retest agreement</b> |
|----------------------------------------------------------------------------------------------------------------------------------------------------------------------------------------------------------------------------------|------------------------------|
| Over the past 7 days, how often did you participate in sitting activities such as reading, watching TV, or doing handcrafts?                                                                                                     | 70%                          |
| What were these activities? (open end question)                                                                                                                                                                                  | 45%                          |
| In average, how many hours did you engage in these sitting activities?                                                                                                                                                           | 65%                          |
| Over the past 7 days, how often did you take a walk outside your home or yard for any reason? For example, for fun or exercise, walking to work, walking the dog, etc                                                            | 60%                          |
| On average, how many hours per day did you spend walking?                                                                                                                                                                        | 54%                          |
| Over the past 7 days, how often did you engage in light sport or recreational activities such as bowling, golf with a cart, shuffleboard, fishing from a boat or pier or other similar activities?                               | 69%                          |
| What were these activities?                                                                                                                                                                                                      | 42%                          |
| On average, how many hours did you engage in these light sport or recreational activities?                                                                                                                                       | 55%                          |
| Over the past 7 days, how often did you engage in moderate sport and recreational activities such as doubles tennis, ballroom dancing, hunting, ice skating, golf without a cart, softball or other similar activities?          | 59%                          |
| What were these activities?                                                                                                                                                                                                      | 41%                          |
| On average, how many hours did you engage in these moderate sport or recreational activities?                                                                                                                                    | 58%                          |
| Over the past 7 days, how often did you engage in strenuous sport and recreational activities such as jogging, swimming, cycling, singles tennis, aerobic dance, skiing (downhill or cross-country) or other similar activities? | 63%                          |
| What were these activities?                                                                                                                                                                                                      | 46%                          |
| On average, how many hours did you engage in these strenuous sport or recreational activities?                                                                                                                                   | 59%                          |
| Over the past 7 days, how often did you do any exercises specifically to increase muscle strength and endurance, such as lifting weights or pushups, etc.?                                                                       | 69%                          |
| What were these activities?                                                                                                                                                                                                      | 60%                          |
| On average, how many hours did you engage in these strenuous sport or recreational activities?                                                                                                                                   | 70%                          |
| <b>HOUSEHOLD ACTIVITY</b>                                                                                                                                                                                                        |                              |
| During the past 7 days, have you done any light housework, such as dusting or washing dishes?                                                                                                                                    | 75%                          |
| During the past 7 days, have you done any heavy housework or chores, such as vacuuming, scrubbing floors, washing windows, or carrying wood?                                                                                     | 76%                          |

|                                                                                                                                 |     |
|---------------------------------------------------------------------------------------------------------------------------------|-----|
| During the past 7 days, did you engage in any of the following activities?<br>Please answer YES or NO for each item.            | 69% |
| WORK RELATED ACTIVITY                                                                                                           |     |
| During the past 7 days, did you work for pay or as a volunteer?                                                                 | 60% |
| How many hours per week did you work for pay and or as a volunteer? ____<br>hours                                               | 41% |
| Which of the following categories best describes the amount of physical<br>activity required on your job and or volunteer work? | 72% |
